# Supplementary material
Source: HighWire-hosted journal article supplement (https://bmjopen.bmj.com/content/14/7/e084084)
Supplement: inline-supplementary-material-1 [file inline-supplementary-material-1.pdf]

Supplementary File 1: PRISMA-P 2015 Checklist

| Section/topic              | #  | Checklist item                                                                                                                                                                                  | Information reported                |                                     | Page number(s)                             |
|----------------------------|----|-------------------------------------------------------------------------------------------------------------------------------------------------------------------------------------------------|-------------------------------------|-------------------------------------|--------------------------------------------|
|                            |    |                                                                                                                                                                                                 | Yes                                 | No                                  |                                            |
| ADMINISTRATIVE INFORMATION |    |                                                                                                                                                                                                 |                                     |                                     |                                            |
| Title                      |    |                                                                                                                                                                                                 |                                     |                                     |                                            |
| Identification             | 1a | Identify the report as a protocol of a systematic review.                                                                                                                                       | <input checked="" type="checkbox"/> | <input type="checkbox"/>            | Identified as a scoping review.            |
| Update                     | 1b | If the protocol is for an update of a previous systematic review, identify as such.                                                                                                             | <input type="checkbox"/>            | <input checked="" type="checkbox"/> | Not an update.                             |
| Registration               | 2  | If registered, provide the name of the registry (e.g., PROSPERO) and registration number in the Abstract                                                                                        | <input checked="" type="checkbox"/> | <input type="checkbox"/>            | Page 12                                    |
| Authors                    |    |                                                                                                                                                                                                 |                                     |                                     |                                            |
| Contact                    | 3a | Provide name, institutional affiliation, and e-mail address of all protocol authors; provide physical mailing address of corresponding author                                                   | <input checked="" type="checkbox"/> | <input type="checkbox"/>            | Title page                                 |
| Contributions              | 3b | Describe contributions of protocol authors and identify the guarantor of the review                                                                                                             | <input checked="" type="checkbox"/> | <input type="checkbox"/>            | Page 12                                    |
| Amendments                 | 4  | If the protocol represents an amendment of a previously completed or published protocol, identify as such and list changes; otherwise, state plan for documenting important protocol amendments | <input type="checkbox"/>            | <input checked="" type="checkbox"/> | N/A                                        |
| Support                    |    |                                                                                                                                                                                                 |                                     |                                     |                                            |
| Sources                    | 5a | Indicate sources of financial or other support for the review                                                                                                                                   | <input type="checkbox"/>            | <input checked="" type="checkbox"/> | Funding statement (no funding) on page 12. |
| Sponsor                    | 5b | Provide name for the review funder and/or sponsor                                                                                                                                               | <input type="checkbox"/>            | <input checked="" type="checkbox"/> | N/A                                        |
| Role of sponsor/funder     | 5c | Describe roles of funder(s), sponsor(s), and/or institution(s), if any, in developing the protocol                                                                                              | <input type="checkbox"/>            | <input checked="" type="checkbox"/> | N/A                                        |
| INTRODUCTION               |    |                                                                                                                                                                                                 |                                     |                                     |                                            |
| Rationale                  | 6  | Describe the rationale for the review in the context of what is already known                                                                                                                   | <input checked="" type="checkbox"/> | <input type="checkbox"/>            | Background section, page 4-6.              |

| Section/topic           | #   | Checklist item                                                                                                                                                                                                            | Information reported                |                          | Page number(s)                                                                        |
|-------------------------|-----|---------------------------------------------------------------------------------------------------------------------------------------------------------------------------------------------------------------------------|-------------------------------------|--------------------------|---------------------------------------------------------------------------------------|
|                         |     |                                                                                                                                                                                                                           | Yes                                 | No                       |                                                                                       |
| Objectives              | 7   | Provide an explicit statement of the question(s) the review will address with reference to participants, interventions, comparators, and outcomes (PICO).                                                                 | <input checked="" type="checkbox"/> | <input type="checkbox"/> | Review question uses PCC rather than PICO. Objective and review questions on page 7.  |
| METHODS                 |     |                                                                                                                                                                                                                           |                                     |                          |                                                                                       |
| Eligibility criteria    | 8   | Specify the study characteristics (e.g., PICO, study design, setting, time frame) and report characteristics (e.g., years considered, language, publication status) to be used as criteria for eligibility for the review | <input checked="" type="checkbox"/> | <input type="checkbox"/> | Page 7                                                                                |
| Information sources     | 9   | Describe all intended information sources (e.g., electronic databases, contact with study authors, trial registers, or other grey literature sources) with planned dates of coverage                                      | <input checked="" type="checkbox"/> | <input type="checkbox"/> | Page 9                                                                                |
| Search strategy         | 10  | Present draft of search strategy to be used for at least one electronic database, including planned limits, such that it could be repeated                                                                                | <input checked="" type="checkbox"/> | <input type="checkbox"/> | Draft strategy in Supplementary File 2. Full search strategy in Supplementary File 3. |
| STUDY RECORDS           |     |                                                                                                                                                                                                                           |                                     |                          |                                                                                       |
| Data management         | 11a | Describe the mechanism(s) that will be used to manage records and data throughout the review                                                                                                                              | <input checked="" type="checkbox"/> | <input type="checkbox"/> | Page 10-11                                                                            |
| Selection process       | 11b | State the process that will be used for selecting studies (e.g., two independent reviewers) through each phase of the review (i.e., screening, eligibility, and inclusion in meta-analysis)                               | <input checked="" type="checkbox"/> | <input type="checkbox"/> | Page 10-11                                                                            |
| Data collection process | 11c | Describe planned method of extracting data from reports (e.g., piloting forms, done independently, in duplicate), any processes for obtaining and confirming data from investigators                                      | <input checked="" type="checkbox"/> | <input type="checkbox"/> | Page 11                                                                               |
| Data items              | 12  | List and define all variables for which data will be sought (e.g., PICO items, funding sources), any pre-planned data assumptions and simplifications.                                                                    | <input checked="" type="checkbox"/> | <input type="checkbox"/> | Page 7-8                                                                              |

| Section/topic                      | #   | Checklist item                                                                                                                                                                                                                              | Information reported                |                                     | Page number(s)           |
|------------------------------------|-----|---------------------------------------------------------------------------------------------------------------------------------------------------------------------------------------------------------------------------------------------|-------------------------------------|-------------------------------------|--------------------------|
|                                    |     |                                                                                                                                                                                                                                             | Yes                                 | No                                  |                          |
| Outcomes and prioritization        | 13  | List and define all outcomes for which data will be sought, including prioritization of main and additional outcomes, with rationale.                                                                                                       | <input type="checkbox"/>            | <input checked="" type="checkbox"/> | N/A for scoping reviews  |
| Risk of bias in individual studies | 14  | Describe anticipated methods for assessing risk of bias of individual studies, including whether this will be done at the outcome or study level, or both; state how this information will be used in data synthesis.                       | <input type="checkbox"/>            | <input checked="" type="checkbox"/> | N/A for scoping reviews  |
| DATA                               |     |                                                                                                                                                                                                                                             |                                     |                                     |                          |
| Synthesis                          | 15a | Describe criteria under which study data will be quantitatively synthesized                                                                                                                                                                 | <input checked="" type="checkbox"/> | <input type="checkbox"/>            | Page 11-12               |
|                                    | 15b | If data are appropriate for quantitative synthesis, describe planned summary measures, methods of handling data, and methods of combining data from studies, including any planned exploration of consistency (e.g., $I^2$ , Kendall's tau) | <input type="checkbox"/>            | <input checked="" type="checkbox"/> | N/A                      |
|                                    | 15c | Describe any proposed additional analyses (e.g., sensitivity or subgroup analyses, meta-regression)                                                                                                                                         | <input type="checkbox"/>            | <input checked="" type="checkbox"/> | N/A                      |
|                                    | 15d | If quantitative synthesis is not appropriate, describe the type of summary planned                                                                                                                                                          | <input checked="" type="checkbox"/> | <input type="checkbox"/>            | Page 11-12               |
| Meta-bias(es)                      | 16  | Specify any planned assessment of meta-bias(es) (e.g., publication bias across studies, selective reporting within studies)                                                                                                                 | <input type="checkbox"/>            | <input checked="" type="checkbox"/> | N/A for scoping reviews. |
| Confidence in cumulative evidence  | 17  | Describe how the strength of the body of evidence will be assessed (e.g., GRADE)                                                                                                                                                            | <input type="checkbox"/>            | <input checked="" type="checkbox"/> | N/A for scoping reviews. |

From: Moher, D., Shamseer, L., Clarke, M. et al. Preferred reporting items for systematic review and meta-analysis protocols (PRISMA-P) 2015 statement. Syst Rev. 2015;4(1):1. doi.org/10.1186/2046-4053-4-1
