# Supplementary material
Source: HighWire-hosted journal article supplement (https://bmjopen.bmj.com/content/14/7/e084084)
Supplement: inline-supplementary-material-2 [file inline-supplementary-material-2.pdf]

Supplementary File 2: Inclusion/Exclusion Screening Form

| Criteria                                  | Process                                                                                                                                                                                                                                                                                                                                                 |
|-------------------------------------------|---------------------------------------------------------------------------------------------------------------------------------------------------------------------------------------------------------------------------------------------------------------------------------------------------------------------------------------------------------|
| 1. <b>Language</b>                        | The full text is available in English. <ul style="list-style-type: none"><li>• If no, exclude based on language.</li><li>• If yes, move to criteria 2.</li></ul>                                                                                                                                                                                        |
| 2. <b>Sources</b>                         | The paper is either published primary research (quantitative, qualitative, mixed methods), a discussion paper, commentary, opinion paper, or grey literature (documents and reports from regulators or regulatory consortiums). <ul style="list-style-type: none"><li>• If no, exclude based on source.</li><li>• If yes, move to criteria 3.</li></ul> |
| 3. <b>Geographical location (Context)</b> | No limitations on geographical location, move to criteria 4.                                                                                                                                                                                                                                                                                            |
| 4. <b>Population</b>                      | The paper focuses on health practitioner regulators. <ul style="list-style-type: none"><li>• If no, exclude based on population.</li><li>• If yes, move to criteria 5.</li></ul>                                                                                                                                                                        |
| 5. <b>Concept</b>                         | The paper focuses on how health practitioner regulators contribute to or perpetuate interpersonal or institutional racism, or the actions health practitioner regulators can take to address racism. <ul style="list-style-type: none"><li>• If no, exclude based on concept.</li><li>• If yes, include.</li></ul>                                      |
